# Supplementary material
Source: publisher figshare collection journal article supplement (https://sage.figshare.com/ndownloader/files/15604082)
Supplement: Supplementary file 1 [file 15604082]

**Occupational Licensing of Social Services and Nursing Home Quality:  
A Regression Discontinuity Approach**

**John R. Bowblis and Austin C. Smith**

**Supplemental Online Appendix**

**Figure A.1. Discontinuities in Social Worker Staffing: Raw Data**

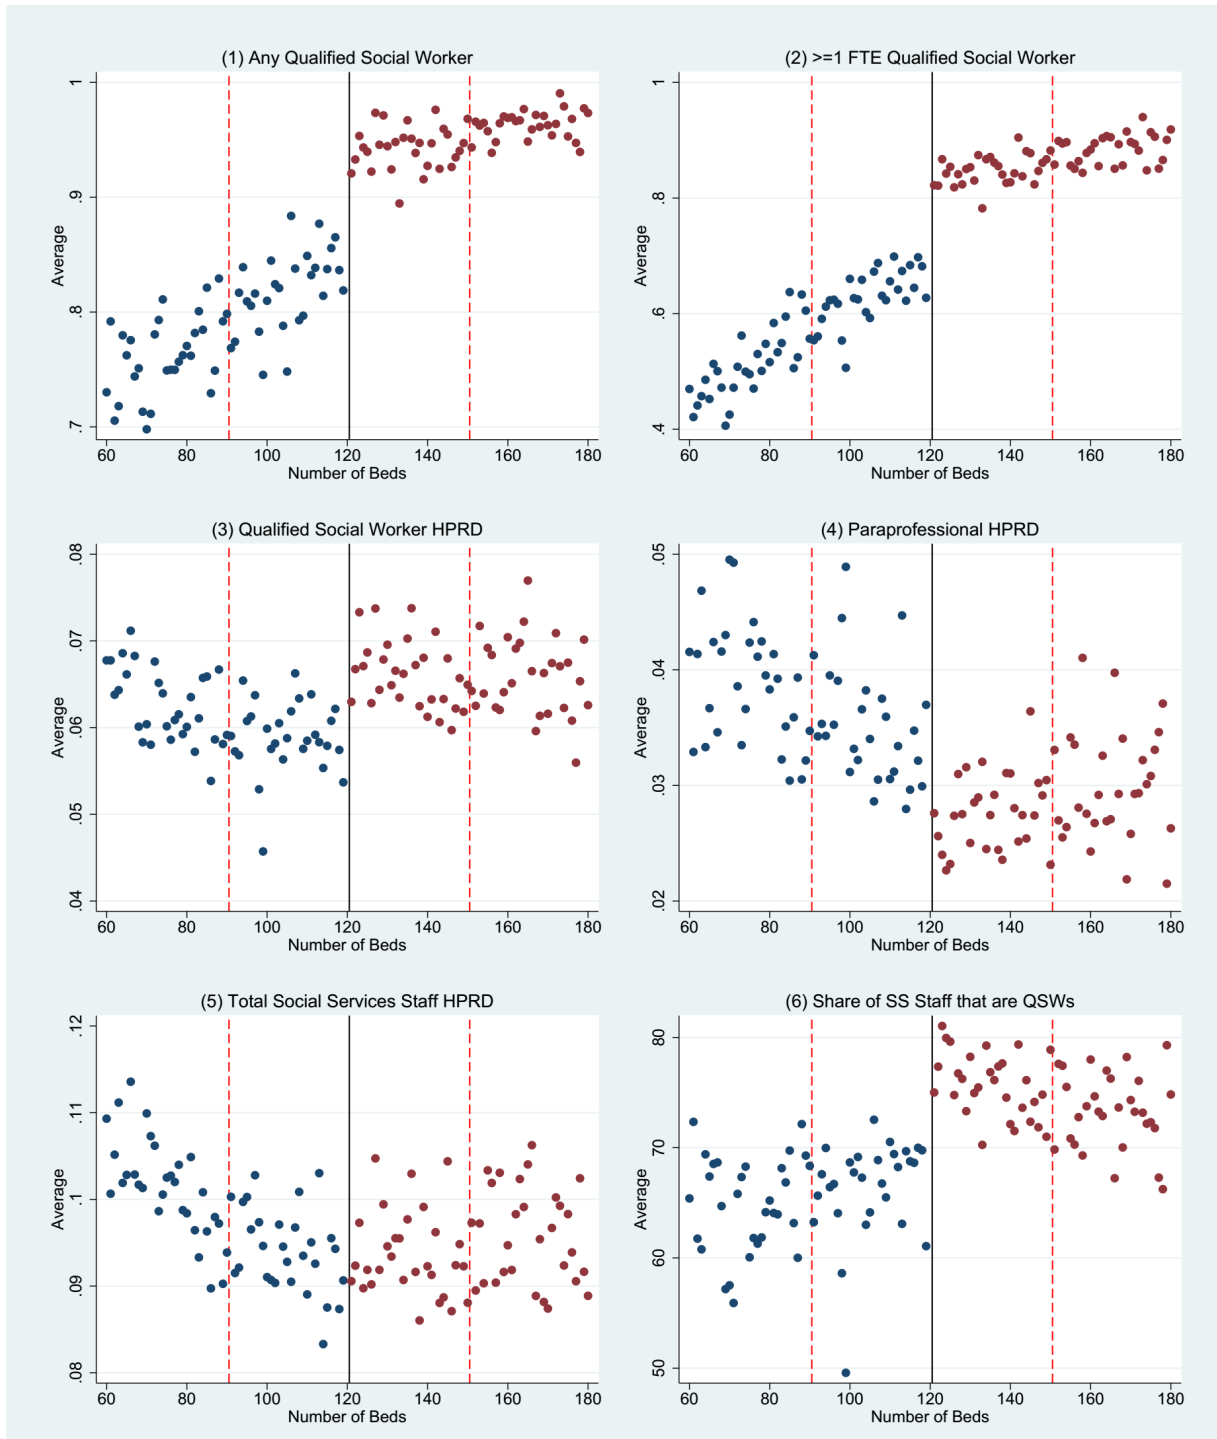

*Notes:* Each dot represents the average value of the dependent variable for facilities with a specific number of beds. Dashed vertical lines illustrate the maximum bandwidth used in main specifications. FTE, full-time equivalent; HPRD, hours per resident day; QSW, qualified social worker; SS, social services.

**Table A.1. Effect of OBRA 1987 Staffing Provision on Other Inputs and Occupancy**

| <i>Variables</i>                     | (1)<br><i>Housekeeping<br/>HPRD</i> | (2)<br><i>Dieticians and<br/>food service<br/>workers HPRD</i> | (3)<br><i>Mental health<br/>staff HPRD</i> | (4)<br><i>Facility has<br/>special care unit<br/>other than for<br/>dementia</i> | (5)<br><i>Facility<br/>occupancy rate</i> | (6)<br><i>Facility<br/>occupancy rate:<br/>including 120-bed<br/>facilities</i> |
|--------------------------------------|-------------------------------------|----------------------------------------------------------------|--------------------------------------------|----------------------------------------------------------------------------------|-------------------------------------------|---------------------------------------------------------------------------------|
| <b>Panel A: Bandwidth of 10 beds</b> |                                     |                                                                |                                            |                                                                                  |                                           |                                                                                 |
| 121+ Bed facility                    | -0.0198<br>(0.0275)                 | -0.0230<br>(0.0314)                                            | -0.00331<br>(0.00416)                      | -0.0127<br>(0.0140)                                                              | 2.734**<br>(0.959)                        | 0.425<br>(0.649)                                                                |
| Observations                         | 24,128                              | 24,128                                                         | 24,128                                     | 24,128                                                                           | 24,037                                    | 43,401                                                                          |
| <b>Panel B: Bandwidth of 20 beds</b> |                                     |                                                                |                                            |                                                                                  |                                           |                                                                                 |
| 121+ Bed facility                    | -0.0185<br>(0.0209)                 | 0.00149<br>(0.0202)                                            | -0.00256<br>(0.00263)                      | -0.00368<br>(0.00824)                                                            | 2.200***<br>(0.586)                       | 0.822<br>(0.589)                                                                |
| Observations                         | 48,134                              | 48,134                                                         | 48,134                                     | 48,134                                                                           | 47,945                                    | 67,304                                                                          |
| <b>Panel C: Bandwidth of 30 beds</b> |                                     |                                                                |                                            |                                                                                  |                                           |                                                                                 |
| 121+ Bed facility                    | -0.00561<br>(0.0163)                | 0.0101<br>(0.0167)                                             | -0.00239<br>(0.00228)                      | -0.00216<br>(0.00665)                                                            | 1.539***<br>(0.511)                       | 0.428<br>(0.546)                                                                |
| Observations                         | 81,188                              | 81,188                                                         | 81,188                                     | 81,188                                                                           | 80,879                                    | 100,238                                                                         |

*Notes:* Estimates are based on local linear regression as described in the Empirical Framework section. All regressions include state and year fixed effects. Additional controls in all regressions are ADL index score, % of patients with dementia or Alzheimer's, % with intellectual disabilities, % Medicare paid, % Medicaid paid, RN HPRD, RN/LPN/CNA Total HPRD, and indicators for whether the facility is government-owned, for-profit, part of a chain, part of a continuing care retirement community, and whether the facility has a dementia special care unit. 120-bed facilities are excluded unless otherwise specified (column (6)). Standard errors (in parentheses) are clustered at the level of the running variable, facility size. ADL, activities for daily living; HPRD, hours per resident day; OBRA, Omnibus Budget Reconciliation Act; RN, registered nurse; LPN, licensed practical nurse; CNA, certified nurse aide.

\*\*\*  $p < 0.01$ ; \*\*  $p < 0.05$ ; \*  $p < 0.1$ .

**Table A.2. Broad Categorization of Nursing Home Regulations and Corresponding Deficiencies**

| <i>Regulation number</i> | <i>Regulation</i>                         | <i>Corresponding F-tags</i> | <i>Broad categorization</i> |
|--------------------------|-------------------------------------------|-----------------------------|-----------------------------|
| §483.10                  | Resident rights                           | F150–F177                   | Quality of life             |
| §483.12                  | Admission, transfer, and discharge rights | F201–F208                   | Quality of life             |
| §483.13                  | Resident behavior and facility practices  | F221–F226                   | Quality of life             |
| §483.15                  | Quality of life                           | F240–F258                   | Quality of life             |
| §483.20                  | Resident assessment                       | F271–F287                   | Quality of care             |
| §483.25                  | Quality of care                           | F309–F334                   | Quality of care             |
| §483.30                  | Nursing services                          | F353–F356                   | Quality of care             |
| §483.35                  | Dietary services                          | F360–F373                   | Quality of care             |
| §483.40                  | Physician services                        | F385–F390                   | Quality of care             |
| §483.45                  | Specialized rehabilitative services       | F406–F407                   | Quality of care             |
| §483.55                  | Dental services                           | F411–F412                   | Quality of care             |
| §483.60                  | Pharmacy services                         | F425–F431                   | Quality of care             |
| §483.65                  | Infection control                         | F441–F445                   | Quality of care             |
| §483.70                  | Physical environment                      | F454–F469                   | Quality of life             |
| §483.75                  | Administration                            | F490–F524                   | Administration              |

*Notes:* As of 2016, the Interpretive Guidelines of the *States Operations Manual* identifies 15 regulatory areas that may result in a deficiency citation. Each deficiency citation is identified by a corresponding F-tag (CMS 2016a). These 15 regulatory areas can be broadly classified as related to quality of life, quality of care, and other areas (Harrington et al. 2000). Although the area each regulation addresses has not changed over the study period, the corresponding F-tags and how they are interpreted have changed from 1998 to 2016. The F-tags reported correspond to those codified at the start of 2016.

**Table A.3. CMS Nursing Home Severity and Scope of Deficiencies: Point Weightings**

| <i>Severity</i>                                                                         | <i>Scope</i>             |                            |                            |
|-----------------------------------------------------------------------------------------|--------------------------|----------------------------|----------------------------|
|                                                                                         | <i>Isolated</i>          | <i>Pattern</i>             | <i>Widespread</i>          |
| Immediate jeopardy to resident health or safety                                         | <b>J</b><br>50/75 points | <b>K</b><br>100/125 points | <b>L</b><br>150/175 points |
| Actual harm that is not immediate jeopardy                                              | <b>G</b><br>20 points    | <b>H</b><br>35/40 points   | <b>I</b><br>45/50 points   |
| No actual harm with potential for more than minimal harm that is not immediate jeopardy | <b>D</b><br>4 points     | <b>E</b><br>8 points       | <b>F</b><br>16/20 points   |
| No actual harm with potential for minimal harm                                          | <b>A</b><br>0 points     | <b>B</b><br>0 points       | <b>C</b><br>0 points       |

*Source:* Centers for Medicare and Medicaid Services (2016b).

*Notes:* Each deficiency is assigned a severity and scope that results in a corresponding letter assignment. This letter assignment corresponds to a number of points used by CMS to determine the number of stars a nursing home (or skilled nursing facility) receives on the Nursing Home Compare website. For severity and scope combinations with two points, the higher point weighting is utilized if the deficiency falls under one of the following regulations: §483.13 resident behavior and nursing home practices, §483.15 quality of life, or §483.25 quality of care. All other deficiencies are weighted by the lower point amount.

**Table A.4. The Effect of OBRA 1987 Staffing Provision on Deficiency Scores**

| <i>Variables</i>                     | (1)<br><i>Total<br/>deficiency<br/>points</i> | (2)<br><i>Quality of life<br/>deficiency<br/>points</i> | (3)<br><i>Provision of<br/>social services<br/>(F250) deficiency<br/>points</i> | (4)<br><i>Provision of<br/>social services<br/>(F250)<br/>deficiency</i> | (5)<br><i>QSW staffing at<br/>121+ beds (F251)<br/>deficiency points</i> | (6)<br><i>QSW staffing at<br/>121+ beds (F251)<br/>deficiency</i> |
|--------------------------------------|-----------------------------------------------|---------------------------------------------------------|---------------------------------------------------------------------------------|--------------------------------------------------------------------------|--------------------------------------------------------------------------|-------------------------------------------------------------------|
| <b>Panel A: Bandwidth of 10 beds</b> |                                               |                                                         |                                                                                 |                                                                          |                                                                          |                                                                   |
| 121+ Bed facility                    | -1.123<br>(1.865)                             | 0.264<br>(0.710)                                        | 0.0221<br>(0.0700)                                                              | 0.00812**<br>(0.00344)                                                   | 0.0163**<br>(0.00632)                                                    | 0.00555***<br>(0.000661)                                          |
| Observations                         | 23,723                                        | 23,723                                                  | 23,723                                                                          | 23,723                                                                   | 23,723                                                                   | 23,723                                                            |
| <b>Panel B: Bandwidth of 20 beds</b> |                                               |                                                         |                                                                                 |                                                                          |                                                                          |                                                                   |
| 121+ Bed facility                    | -0.0493<br>(1.078)                            | -0.0720<br>(0.383)                                      | 0.0443<br>(0.0473)                                                              | 0.00510<br>(0.00313)                                                     | 0.0207***<br>(0.00539)                                                   | 0.00574***<br>(0.000607)                                          |
| Observations                         | 47,197                                        | 47,197                                                  | 47,197                                                                          | 47,197                                                                   | 47,197                                                                   | 47,197                                                            |
| <b>Panel C: Bandwidth of 30 beds</b> |                                               |                                                         |                                                                                 |                                                                          |                                                                          |                                                                   |
| 121+ Bed facility                    | -1.095<br>(0.909)                             | -0.424<br>(0.367)                                       | 0.0340<br>(0.0347)                                                              | 0.00664**<br>(0.00287)                                                   | 0.0194***<br>(0.00454)                                                   | 0.00482***<br>(0.000599)                                          |
| Observations                         | 79,581                                        | 79,581                                                  | 79,581                                                                          | 79,581                                                                   | 79,581                                                                   | 79,581                                                            |

*Notes:* Estimates are based on local linear regression as described in the Empirical Framework section. All regressions include state and year fixed effects. Additional controls in all regressions are ADL index score, % of patients with dementia or Alzheimer's, % with intellectual disabilities, % Medicare paid, % Medicaid paid, RN HPRD, RN/LPN/CNA Total HPRD, and indicators for whether the facility is government-owned, for-profit, part of a chain, part of a continuing care retirement community, and whether the facility has a dementia special care unit. Standard errors (in parentheses) are clustered at the level of the running variable, facility size. ADL, activities for daily living; HPRD, hours per resident day; OBRA, Omnibus Budget Reconciliation Act; QSW, qualified social worker; RN, registered nurse; LPN, licensed practical nurse; CNA, certified nurse aide.

\*\*\*  $p < 0.01$ ; \*\*  $p < 0.05$ ; \*  $p < 0.1$ .

**Table A.5. IV Estimates of the Impact of the Substitution toward QSWs on Deficiency Scores: No Additional Controls**

| <i>Variables</i>                     | (1)                                    | (2)                                              | (3)                                                                      | (4)                                                               | (5)                                                               | (6)                                                        |
|--------------------------------------|----------------------------------------|--------------------------------------------------|--------------------------------------------------------------------------|-------------------------------------------------------------------|-------------------------------------------------------------------|------------------------------------------------------------|
|                                      | <i>Total<br/>deficiency<br/>points</i> | <i>Quality of life<br/>deficiency<br/>points</i> | <i>Provision of<br/>social services<br/>(F250) deficiency<br/>points</i> | <i>Provision of<br/>social services<br/>(F250)<br/>deficiency</i> | <i>QSW staffing at<br/>121+ beds (F251)<br/>deficiency points</i> | <i>QSW staffing at<br/>121+ beds (F251)<br/>deficiency</i> |
| <b>Panel A: Bandwidth of 10 beds</b> |                                        |                                                  |                                                                          |                                                                   |                                                                   |                                                            |
| Share QSWs (0–100)                   | –0.211<br>(0.364)                      | 0.000483<br>(0.108)                              | 0.00192<br>(0.0106)                                                      | 0.000901<br>(0.000876)                                            | 0.00190*<br>(0.000994)                                            | 0.000698***<br>(0.000259)                                  |
| Observations                         | 23,723                                 | 23,723                                           | 23,723                                                                   | 23,723                                                            | 23,723                                                            | 23,723                                                     |
| <b>Panel B: Bandwidth of 20 beds</b> |                                        |                                                  |                                                                          |                                                                   |                                                                   |                                                            |
| Share QSWs (0–100)                   | 0.0263<br>(0.165)                      | –0.0112<br>(0.0551)                              | 0.00653<br>(0.00759)                                                     | 0.000757<br>(0.000464)                                            | 0.00296***<br>(0.000775)                                          | 0.000827***<br>(0.000148)                                  |
| Observations                         | 47,197                                 | 47,197                                           | 47,197                                                                   | 47,197                                                            | 47,197                                                            | 47,197                                                     |
| <b>Panel C: Bandwidth of 30 beds</b> |                                        |                                                  |                                                                          |                                                                   |                                                                   |                                                            |
| Share QSWs (0–100)                   | –0.191<br>(0.152)                      | –0.0760<br>(0.0562)                              | 0.00509<br>(0.00586)                                                     | 0.00101**<br>(0.000506)                                           | 0.00300***<br>(0.000719)                                          | 0.000749***<br>(0.000125)                                  |
| Observations                         | 79,581                                 | 79,581                                           | 79,581                                                                   | 79,581                                                            | 79,581                                                            | 79,581                                                     |

*Notes:* Estimates are based on local linear regression as described in the Empirical Framework section. The first-stage  $F$ -statistic for the bandwidths of 10, 20, and 30 beds are 12.2, 31.9, and 43.9, respectively. All regressions include state and year fixed effects. Standard errors (in parentheses) are clustered at the level of the running variable, facility size. IV, instrumental variables; QSW, qualified social worker.

\*\*\*  $p < 0.01$ ; \*\*  $p < 0.05$ ; \*  $p < 0.1$ .

**Table A.6. IV Estimates of the Impact of the Substitution toward QSWs on Deficiency Scores: Including 120-Bed Facilities**

| <i>Variables</i>                     | (1)<br><i>Total<br/>deficiency<br/>points</i> | (2)<br><i>Quality of life<br/>deficiency<br/>points</i> | (3)<br><i>Provision of<br/>social services<br/>(F250) deficiency<br/>points</i> | (4)<br><i>Provision of<br/>social services<br/>(F250) deficiency</i> | (5)<br><i>QSW staffing at<br/>121+ beds (F251)<br/>deficiency points</i> | (6)<br><i>QSW staffing at<br/>121+ beds (F251)<br/>deficiency</i> |
|--------------------------------------|-----------------------------------------------|---------------------------------------------------------|---------------------------------------------------------------------------------|----------------------------------------------------------------------|--------------------------------------------------------------------------|-------------------------------------------------------------------|
| <b>Panel A: Bandwidth of 10 beds</b> |                                               |                                                         |                                                                                 |                                                                      |                                                                          |                                                                   |
| Share QSWs (0–100)                   | 0.111<br>(0.321)                              | –0.0373<br>(0.0921)                                     | 0.00890<br>(0.00779)                                                            | 0.000842<br>(0.000837)                                               | 0.00254*<br>(0.00140)                                                    | 0.000902***<br>(0.000324)                                         |
| Observations                         | 42,832                                        | 42,832                                                  | 42,832                                                                          | 42,832                                                               | 42,832                                                                   | 42,832                                                            |
| <b>Panel B: Bandwidth of 20 beds</b> |                                               |                                                         |                                                                                 |                                                                      |                                                                          |                                                                   |
| Share QSWs (0–100)                   | 0.107<br>(0.123)                              | –0.0453<br>(0.0377)                                     | 0.00658<br>(0.00493)                                                            | 0.000604*<br>(0.000312)                                              | 0.00347***<br>(0.000945)                                                 | 0.000951***<br>(0.000120)                                         |
| Observations                         | 66,306                                        | 66,306                                                  | 66,306                                                                          | 66,306                                                               | 66,306                                                                   | 66,306                                                            |
| <b>Panel C: Bandwidth of 30 beds</b> |                                               |                                                         |                                                                                 |                                                                      |                                                                          |                                                                   |
| Share QSWs (0–100)                   | –0.0417<br>(0.116)                            | –0.0512<br>(0.0375)                                     | 0.00606<br>(0.00421)                                                            | 0.000844***<br>(0.000326)                                            | 0.00332***<br>(0.000781)                                                 | 0.000816***<br>(0.000109)                                         |
| Observations                         | 98,690                                        | 98,690                                                  | 98,690                                                                          | 98,690                                                               | 98,690                                                                   | 98,690                                                            |

*Notes:* Estimates are based on local linear regression as described in the Empirical Framework section. The first-stage  $F$ -statistic for the bandwidths of 10, 20, and 30 beds are 16.2, 65.6, and 91.4, respectively. All regressions include state and year fixed effects. Additional controls in all regressions are ADL index score, % of patients with dementia or Alzheimer's, % with intellectual disabilities, % Medicare paid, % Medicaid paid, RN HPRD, RN/LPN/CNA Total HPRD, and indicators for whether the facility is government-owned, for-profit, part of a chain, part of a continuing care retirement community, and whether the facility has a dementia special care unit. Standard errors (in parentheses) are clustered at the level of the running variable, facility size. ADL, activities for daily living; HPRD, hours per resident day; IV, instrumental variables; QSW, qualified social worker; RN, registered nurse; LPN, licensed practical nurse; CNA, certified nurse aide.

\*\*\*  $p < 0.01$ ; \*\*  $p < 0.05$ ; \*  $p < 0.1$ .



**Table A.7. IV Estimates of the Impact of the Substitution toward QSWs on Deficiency Scores: With State-Specific Linear Time Trends**

| <i>Variables</i>                     | (1)<br><i>Total<br/>deficiency<br/>points</i> | (2)<br><i>Quality of life<br/>deficiency<br/>points</i> | (3)<br><i>Provision of<br/>social services<br/>(F250)<br/>deficiency points</i> | (4)<br><i>Provision of<br/>social services<br/>(F250)<br/>deficiency</i> | (5)<br><i>QSW staffing at<br/>121+ beds<br/>(F251) deficiency<br/>points</i> | (6)<br><i>QSW staffing at<br/>121+ beds (F251)<br/>deficiency</i> |
|--------------------------------------|-----------------------------------------------|---------------------------------------------------------|---------------------------------------------------------------------------------|--------------------------------------------------------------------------|------------------------------------------------------------------------------|-------------------------------------------------------------------|
| <b>Panel A: Bandwidth of 10 beds</b> |                                               |                                                         |                                                                                 |                                                                          |                                                                              |                                                                   |
| Share QSWs (0-100)                   | -0.143<br>(0.351)                             | 0.0168<br>(0.104)                                       | 0.00240<br>(0.0107)                                                             | 0.000854<br>(0.000863)                                                   | 0.00215**<br>(0.00109)                                                       | 0.000734***<br>(0.000268)                                         |
| Observations                         | 23,723                                        | 23,723                                                  | 23,723                                                                          | 23,723                                                                   | 23,723                                                                       | 23,723                                                            |
| <b>Panel B: Bandwidth of 20 beds</b> |                                               |                                                         |                                                                                 |                                                                          |                                                                              |                                                                   |
| Share QSWs (0-100)                   | -0.0440<br>(0.159)                            | -0.0266<br>(0.0589)                                     | 0.00632<br>(0.00765)                                                            | 0.000732<br>(0.000501)                                                   | 0.00306***<br>(0.000758)                                                     | 0.000840***<br>(0.000138)                                         |
| Observations                         | 47,197                                        | 47,197                                                  | 47,197                                                                          | 47,197                                                                   | 47,197                                                                       | 47,197                                                            |
| <b>Panel C: Bandwidth of 30 beds</b> |                                               |                                                         |                                                                                 |                                                                          |                                                                              |                                                                   |
| Share QSWs (0-100)                   | -0.185<br>(0.142)                             | -0.0739<br>(0.0572)                                     | 0.00472<br>(0.00596)                                                            | 0.000974*<br>(0.000514)                                                  | 0.00301***<br>(0.000718)                                                     | 0.000746***<br>(0.000120)                                         |
| Observations                         | 79,581                                        | 79,581                                                  | 79,581                                                                          | 79,581                                                                   | 79,581                                                                       | 79,581                                                            |

*Notes:* Estimates are based on local linear regression as described in the Empirical Framework section. The first-stage  $F$ -statistic for the bandwidths of 10, 20, and 30 beds are 12.5, 36.7, and 48.5, respectively. All regressions include state and year fixed effects and state-specific linear time trends. Additional controls in all regressions are ADL index score, % of patients with dementia or Alzheimer's, % with intellectual disabilities, % Medicare paid, % Medicaid paid, RN HPRD, RN/LPN/CNA Total HPRD, and indicators for whether the facility is government-owned, for-profit, part of a chain, part of a continuing care retirement community, and whether the facility has a dementia special care unit. Standard errors (in parentheses) are clustered at the level of the running variable, facility size. ADL, activities for daily living; HPRD, hours per resident day; IV, instrumental variables; QSW, qualified social worker; RN, registered nurse; LPN, licensed practical nurse; CNA, certified nurse aide.

\*\*\*  $p < 0.01$ ; \*\*  $p < 0.05$ ; \*  $p < 0.1$ .

**Table A.8. IV Estimates of the Impact of the Substitution toward QSWs on Deficiency Scores: States with License Requirements**

| <i>Variables</i>                     | (1)<br><i>Total<br/>deficiency<br/>points</i> | (2)<br><i>Quality of life<br/>deficiency<br/>points</i> | (3)<br><i>Provision of<br/>social services<br/>(F250)<br/>deficiency points</i> | (4)<br><i>Provision of<br/>social services<br/>(F250)<br/>deficiency</i> | (5)<br><i>QSW staffing at<br/>121+ beds (F251)<br/>deficiency points</i> | (6)<br><i>QSW staffing at<br/>121+ beds (F251)<br/>deficiency</i> |
|--------------------------------------|-----------------------------------------------|---------------------------------------------------------|---------------------------------------------------------------------------------|--------------------------------------------------------------------------|--------------------------------------------------------------------------|-------------------------------------------------------------------|
| <b>Panel A: Bandwidth of 10 beds</b> |                                               |                                                         |                                                                                 |                                                                          |                                                                          |                                                                   |
| Share QSWs (0–100)                   | –0.206<br>(0.641)                             | 0.122<br>(0.196)                                        | 0.0266*<br>(0.0158)                                                             | 0.00213<br>(0.00174)                                                     | 0.00417<br>(0.00299)                                                     | 0.00128*<br>(0.000749)                                            |
| Observations                         | 9,937                                         | 9,937                                                   | 9,937                                                                           | 9,937                                                                    | 9,937                                                                    | 9,937                                                             |
| <b>Panel B: Bandwidth of 20 beds</b> |                                               |                                                         |                                                                                 |                                                                          |                                                                          |                                                                   |
| Share QSWs (0–100)                   | –0.110<br>(0.510)                             | –0.00108<br>(0.173)                                     | 0.0203*<br>(0.0113)                                                             | 0.00151<br>(0.00154)                                                     | 0.00683**<br>(0.00275)                                                   | 0.00202***<br>(0.000558)                                          |
| Observations                         | 19,934                                        | 19,934                                                  | 19,934                                                                          | 19,934                                                                   | 19,934                                                                   | 19,934                                                            |
| <b>Panel C: Bandwidth of 30 beds</b> |                                               |                                                         |                                                                                 |                                                                          |                                                                          |                                                                   |
| Share QSWs (0–100)                   | –0.285<br>(0.383)                             | –0.0885<br>(0.136)                                      | 0.00877<br>(0.00826)                                                            | 0.000901<br>(0.00111)                                                    | 0.00580***<br>(0.00195)                                                  | 0.00152***<br>(0.000356)                                          |
| Observations                         | 37,118                                        | 37,118                                                  | 37,118                                                                          | 37,118                                                                   | 37,118                                                                   | 37,118                                                            |

*Notes:* Estimates are based on local linear regression as described in the Empirical Framework section. The first-stage  $F$ -statistic for the bandwidths of 10, 20, and 30 beds are 4.3, 15.0, and 22.5, respectively. Sample is limited to observations in states that require QSWs to be licensed. All regressions include state and year fixed effects. Additional controls in all regressions are ADL index score, % of patients with dementia or Alzheimer's, % with intellectual disabilities, % Medicare paid, % Medicaid paid, RN HPRD, RN/LPN/CNA Total HPRD, and indicators for whether the facility is government-owned, for-profit, part of a chain, part of a continuing care retirement community, and whether the facility has a dementia special care unit. Standard errors (in parentheses) are clustered at the level of the running variable, facility size. ADL, activities for daily living; HPRD, hours per resident day; IV, instrumental variables; QSW, qualified social worker; RN, registered nurse; LPN, licensed practical nurse; CNA, certified nurse aide. \*\*\*  $p < 0.01$ ; \*\*  $p < 0.05$ ; \*  $p < 0.1$ .

**Table A.9. IV Estimates of the Impact of the Substitution toward QSWs on Deficiency Scores: States without License Requirements**

| <i>Variables</i>                     | (1)<br><i>Total<br/>deficiency<br/>points</i> | (2)<br><i>Quality of life<br/>deficiency<br/>points</i> | (3)<br><i>Provision of<br/>social services<br/>(F250)<br/>deficiency points</i> | (4)<br><i>Provision of<br/>social services<br/>(F250)<br/>deficiency</i> | (5)<br><i>QSW staffing at<br/>121+ beds<br/>(F251) deficiency<br/>points</i> | (6)<br><i>QSW staffing at<br/>121+ beds (F251)<br/>deficiency</i> |
|--------------------------------------|-----------------------------------------------|---------------------------------------------------------|---------------------------------------------------------------------------------|--------------------------------------------------------------------------|------------------------------------------------------------------------------|-------------------------------------------------------------------|
| <b>Panel A: Bandwidth of 10 beds</b> |                                               |                                                         |                                                                                 |                                                                          |                                                                              |                                                                   |
| Share QSWs (0–100)                   | –0.137<br>(0.428)                             | –0.0248<br>(0.131)                                      | –0.0116<br>(0.0170)                                                             | 0.000421<br>(0.00104)                                                    | 0.00103<br>(0.000717)                                                        | 0.000436**<br>(0.000205)                                          |
| Observations                         | 13,786                                        | 13,786                                                  | 13,786                                                                          | 13,786                                                                   | 13,786                                                                       | 13,786                                                            |
| <b>Panel B: Bandwidth of 20 beds</b> |                                               |                                                         |                                                                                 |                                                                          |                                                                              |                                                                   |
| Share QSWs (0–100)                   | 0.0292<br>(0.198)                             | –0.0136<br>(0.0579)                                     | 0.00129<br>(0.0102)                                                             | 0.000425<br>(0.000435)                                                   | 0.00167**<br>(0.000821)                                                      | 0.000417***<br>(0.000130)                                         |
| Observations                         | 27,263                                        | 27,263                                                  | 27,263                                                                          | 27,263                                                                   | 27,263                                                                       | 27,263                                                            |
| <b>Panel C: Bandwidth of 30 beds</b> |                                               |                                                         |                                                                                 |                                                                          |                                                                              |                                                                   |
| Share QSWs (0–100)                   | –0.101<br>(0.166)                             | –0.0549<br>(0.0544)                                     | 0.00367<br>(0.00889)                                                            | 0.00123**<br>(0.000573)                                                  | 0.00178*<br>(0.000936)                                                       | 0.000410***<br>(0.000138)                                         |
| Observations                         | 42,463                                        | 42,463                                                  | 42,463                                                                          | 42,463                                                                   | 42,463                                                                       | 42,463                                                            |

*Notes:* Estimates are based on local linear regression as described in the Empirical Framework section. The first-stage  $F$ -statistic for the bandwidths of 10, 20, and 30 beds are 7.9, 19.5, and 20.4, respectively. Sample is limited to observations in states that do not require QSWs to be licensed. All regressions include state and year fixed effects. Additional controls in all regressions are ADL index score, % of patients with dementia or Alzheimer's, % with intellectual disabilities, % Medicare paid, % Medicaid paid, RN HPRD, RN/LPN/CNA Total HPRD, and indicators for whether the facility is government-owned, for-profit, part of a chain, part of a continuing care retirement community, and whether the facility has a dementia special care unit. Standard errors (in parentheses) are clustered at the level of the running variable, facility size. ADL, activities for daily living; HPRD, hours per resident day; IV, instrumental variables; QSW, qualified social worker; RN, registered nurse; LPN, licensed practical nurse; CNA, certified nurse aide. \*\*\*  $p < 0.01$ ; \*\*  $p < 0.05$ ; \*  $p < 0.1$ .
